# Supplementary material for: Content Variations in Oleocanthalic Acid and Other Phenolic Compounds in Extra-Virgin Olive Oil during Storage
Source: MDPI journal article supplement (doi:10.3390/foods11091354), 2022-05-06
Supplement: s1 [file s1]

### Hydroxytyrosol

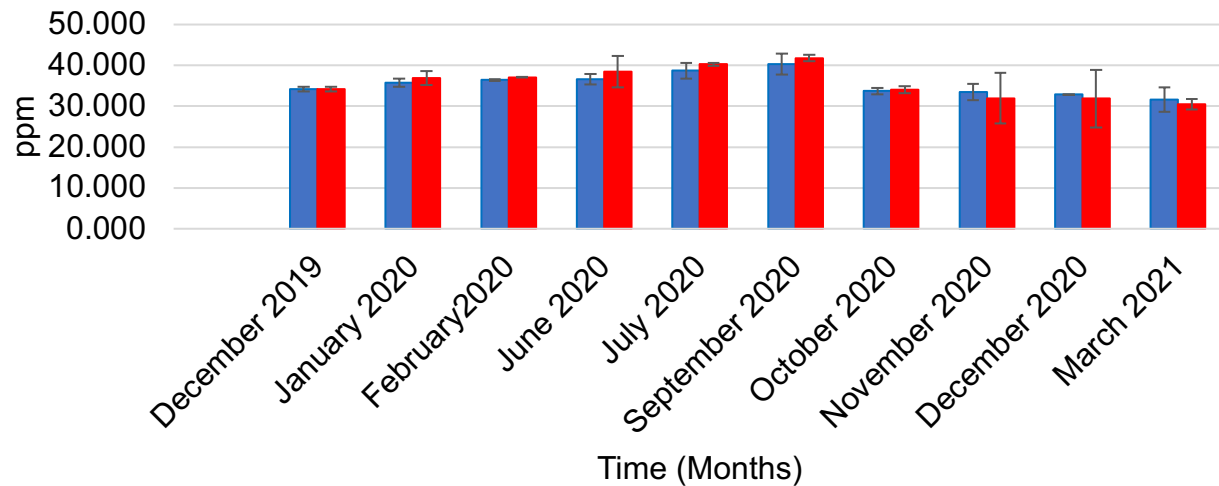

### Oleacein

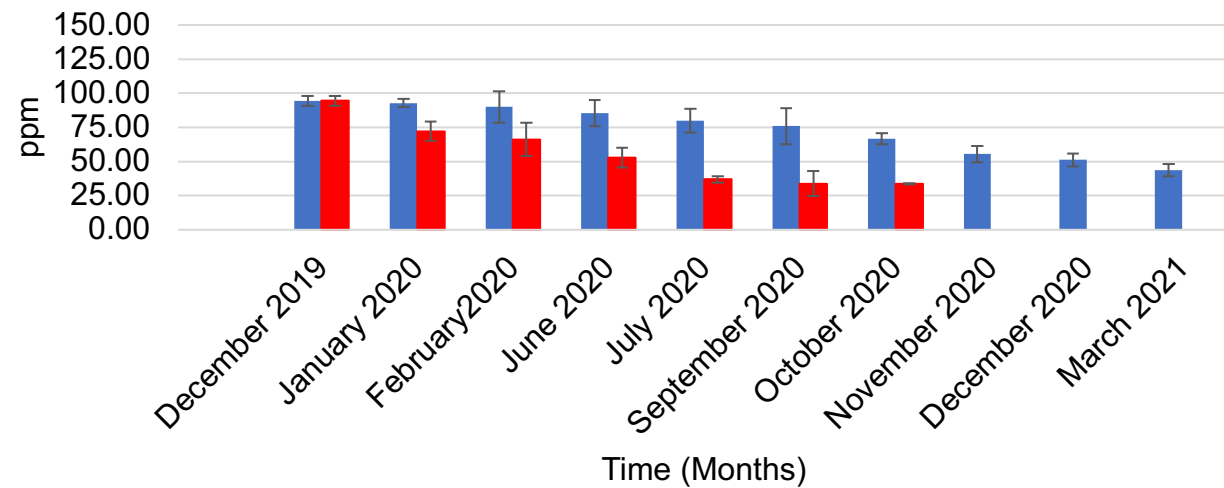

■ Storage at 4°C and in dark condition ■ Storage at room temperature and in light condition

(c)
