# Supplementary figures and images for: Content Variations in Oleocanthalic Acid and Other Phenolic Compounds in Extra-Virgin Olive Oil during Storage
Source: MDPI journal article supplement (doi:10.3390/foods11091354), 2022-05-06

# EVOO A

Hydroxytyrosol

Tyrosol

IS

Oleacein

Oleocanthal

Oleocanthalic Acid

AU

AU

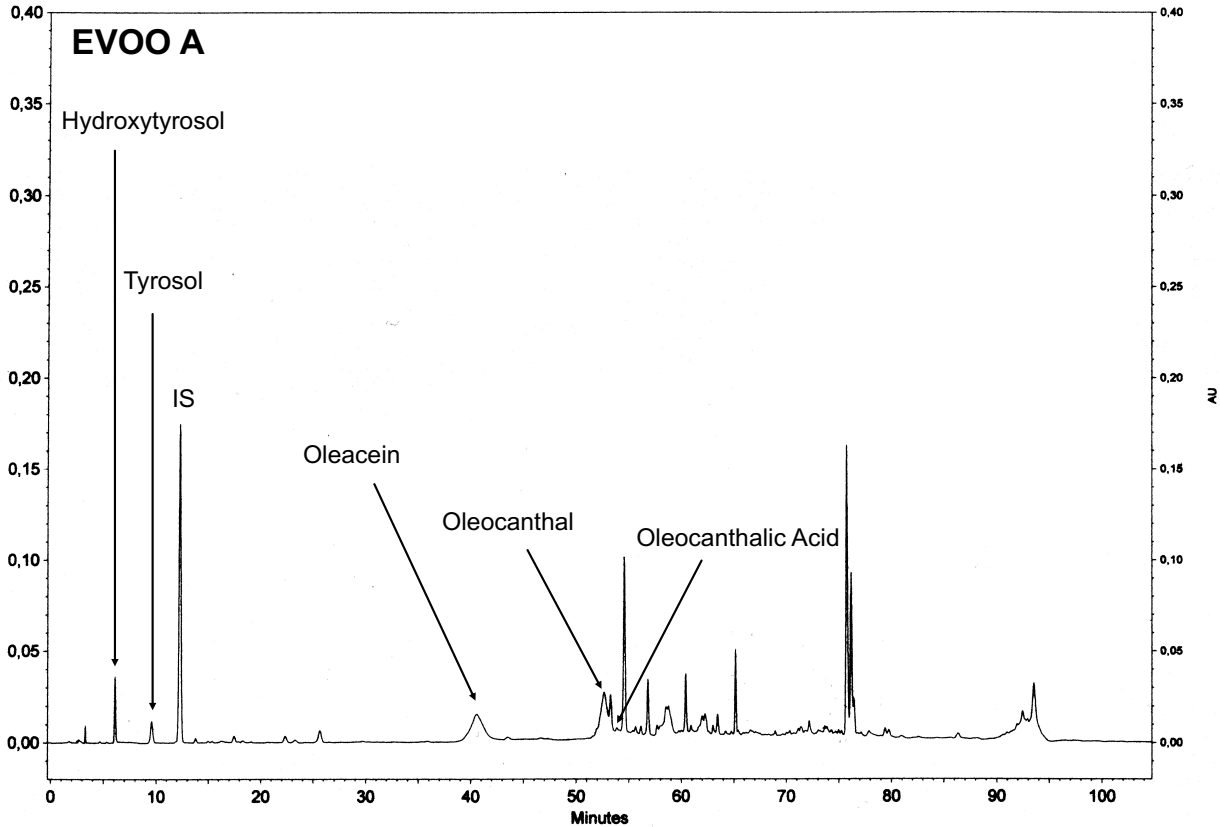

Supplement: s1 [file s1]

# EVOO C

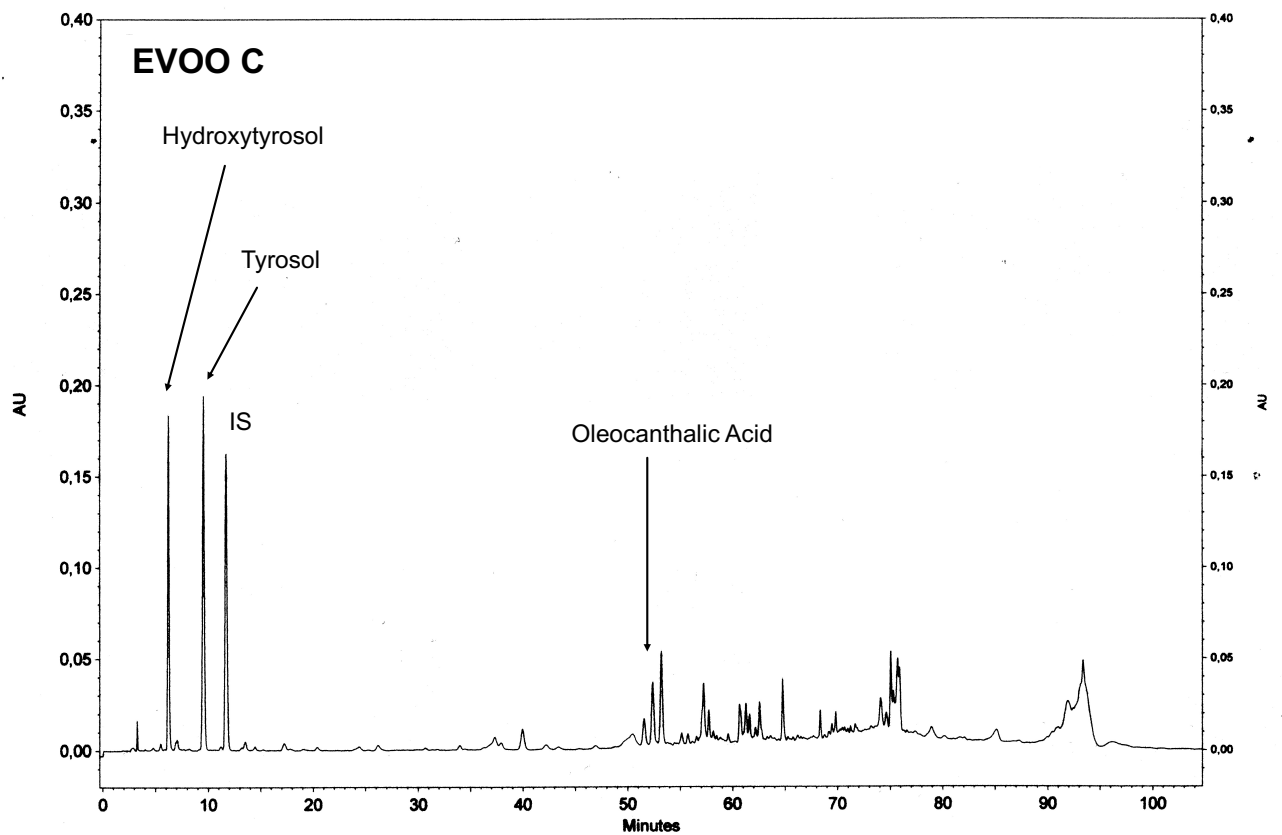

Supplement: s1 [file s1]

# EVOO A

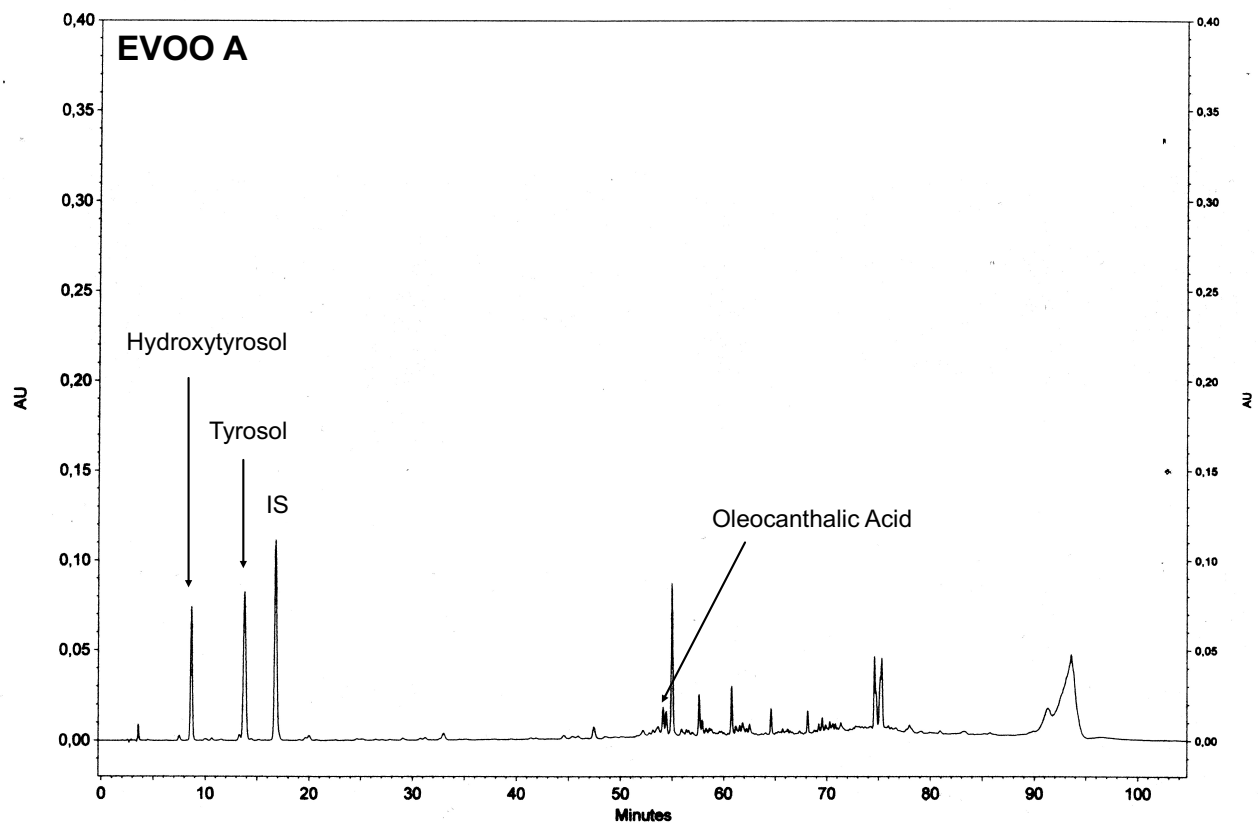

Supplement: s1 [file s1]

# EVOO B

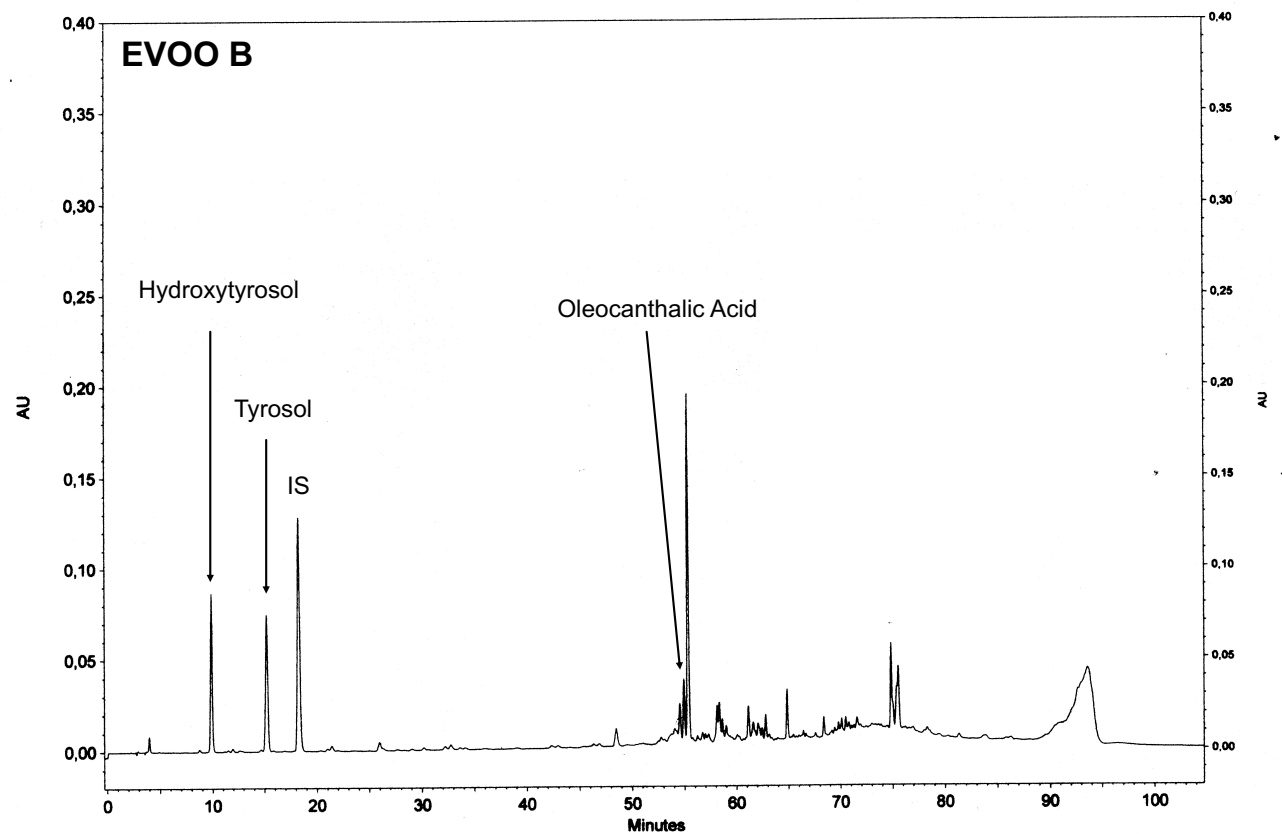

Supplement: s1 [file s1]

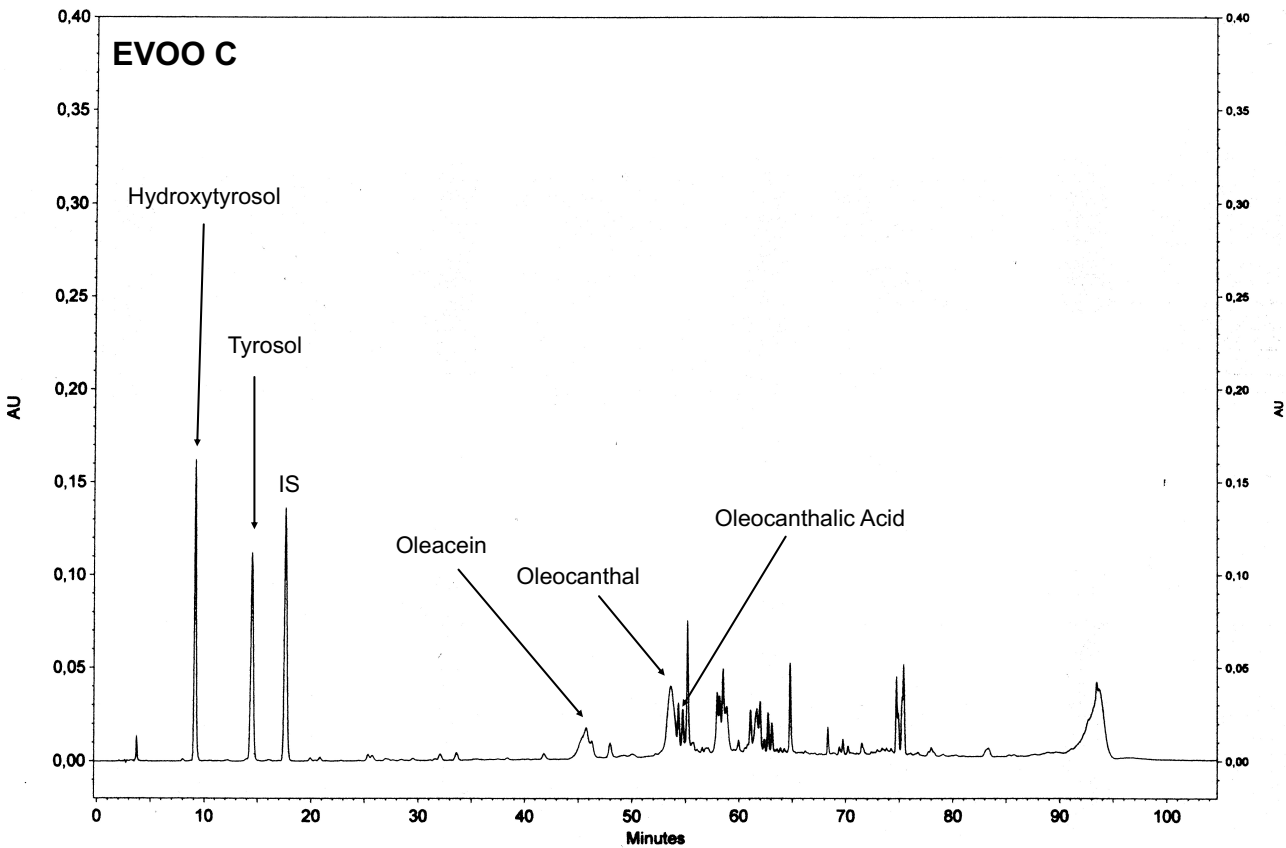

Supplement: s1 [file s1]

# EVOO C

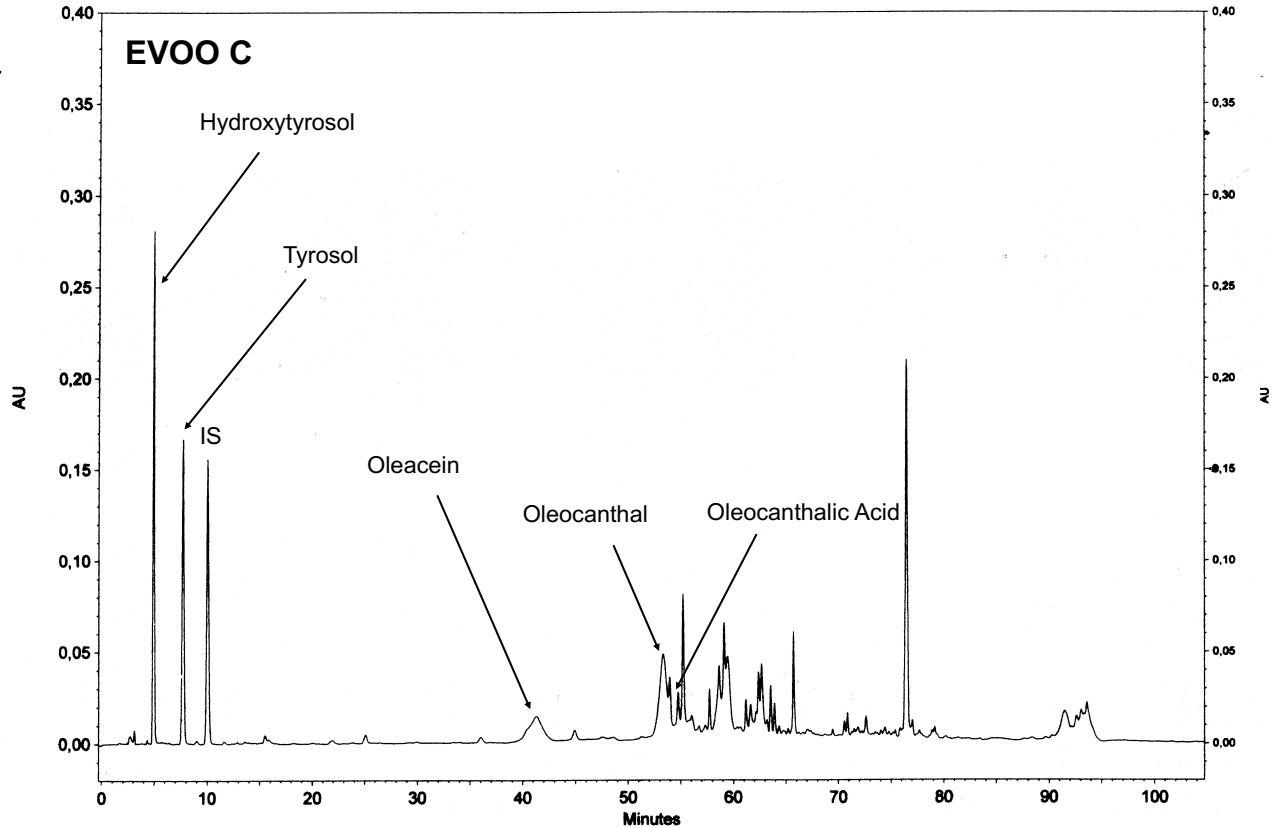

Supplement: s1 [file s1]

# EVOO B

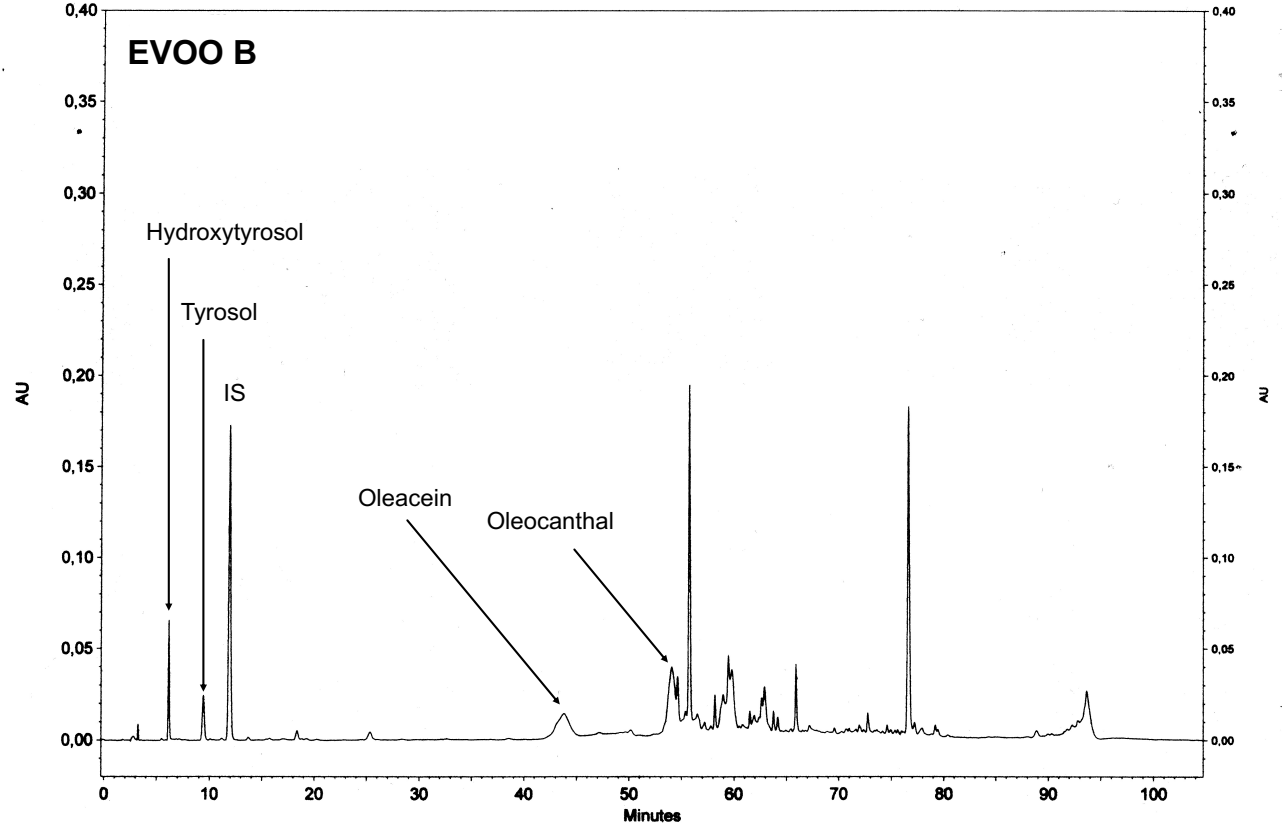

Supplement: s1 [file s1]

# EVOO B

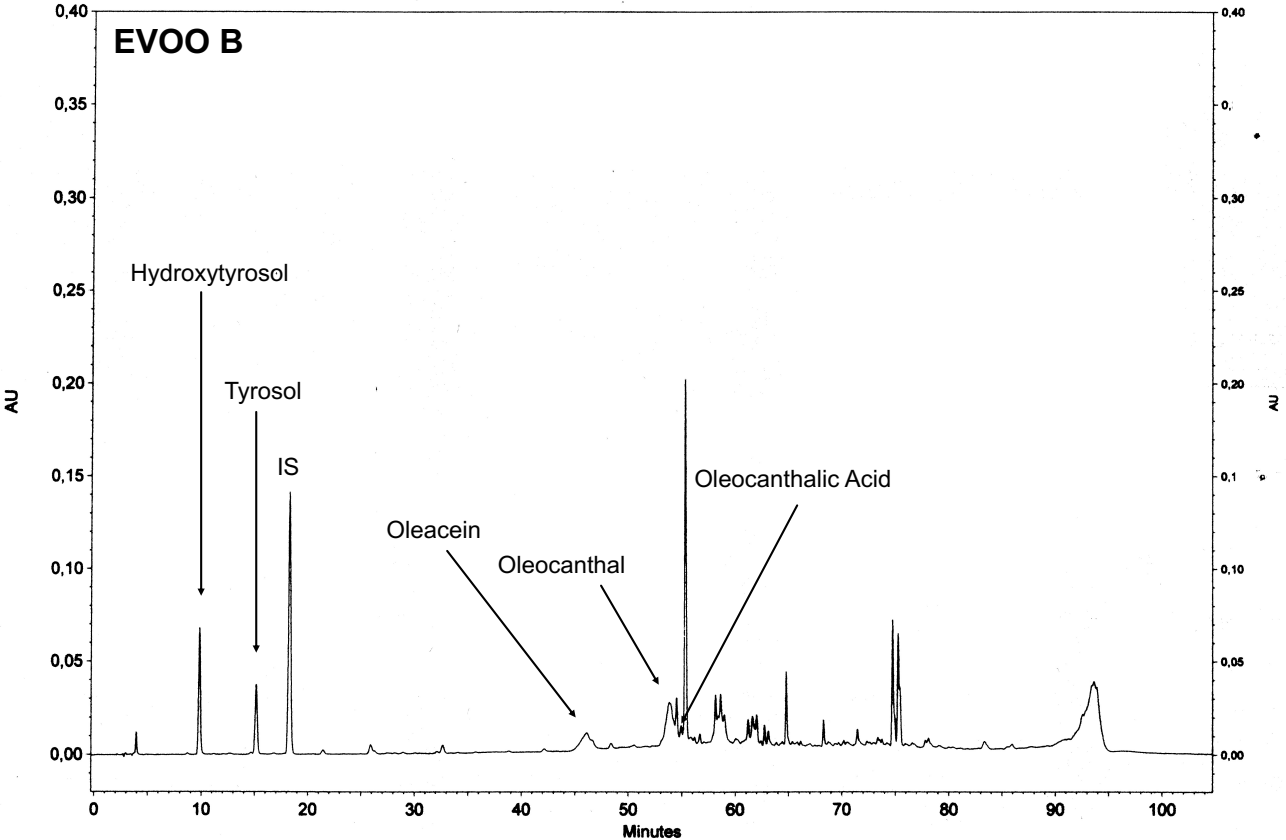

Supplement: s1 [file s1]

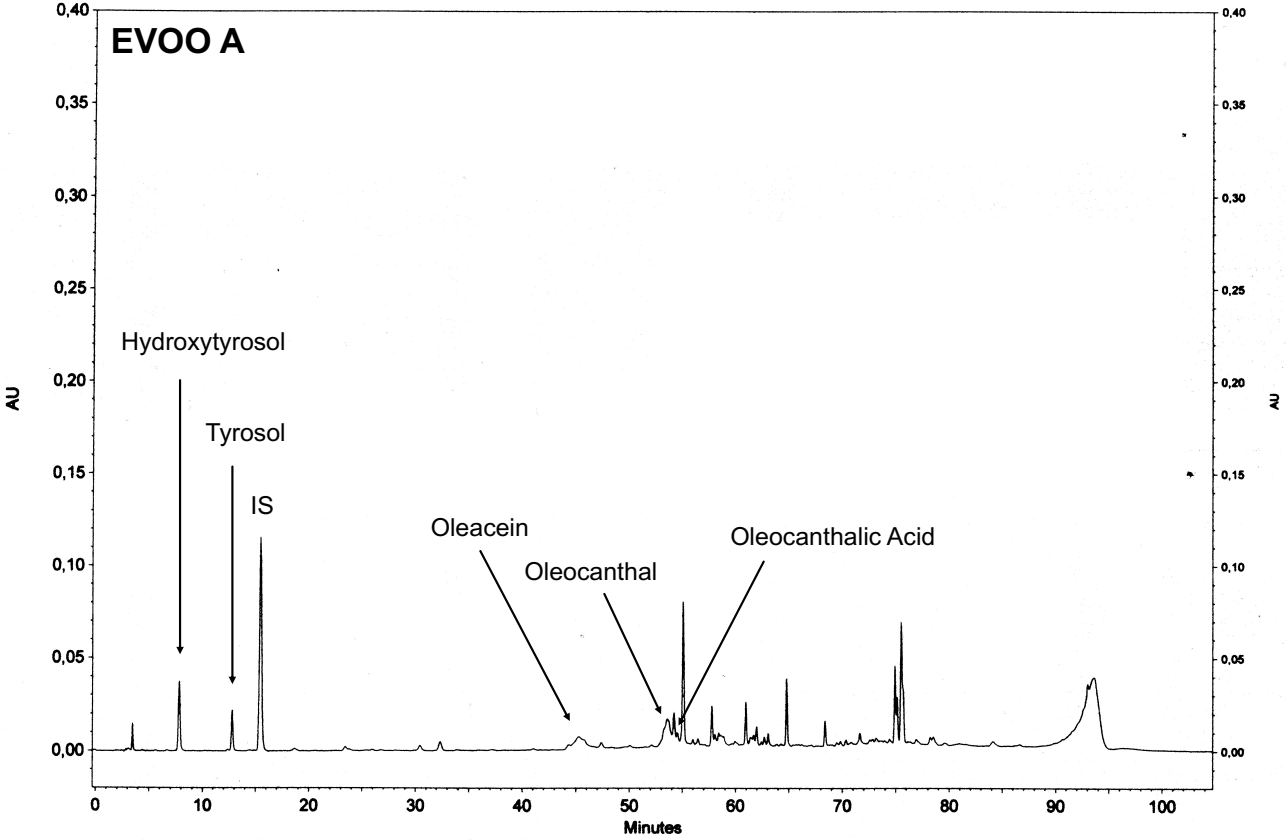

Supplement: s1 [file s1]
